# Supplementary material
Source: Springer Nature journal article supplement (https://www.springermedizin.de/resource/supplementary/12985_2009_675_MOESM1_ESM.pdf/9608246)

A.

Vellore, India

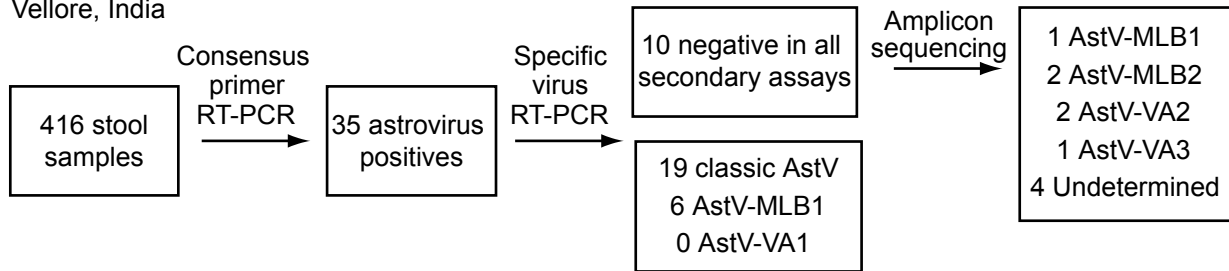

B.

St. Louis, USA

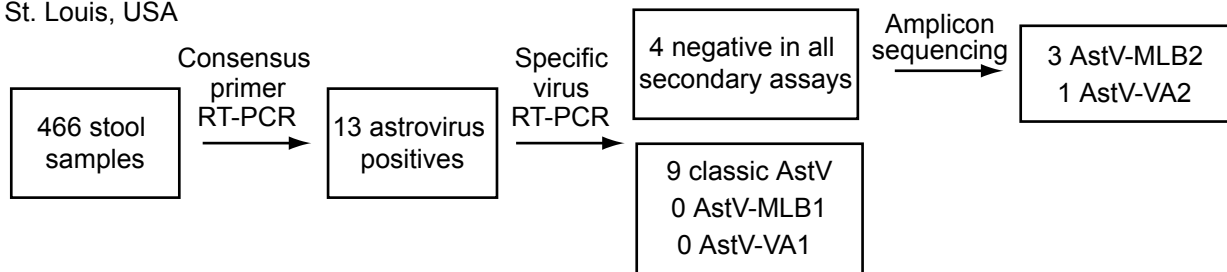

Supplement: MOESM1 [file 9608246]
